# Supplementary material for: Genome sequencing in cytogenetics: Comparison of short‐read and linked‐read approaches for germline structural variant detection and characterization
Source: PubMed Central journal article supplement — Mol Genet Genomic Med. 2020 Jan 27;8(3):e1114. doi: 10.1002/mgg3.1114 (PMC7057128; doi:10.1002/mgg3.1114), 2020-01-27
Supplement: MGG3-8-e1114-s001.pdf [file MGG3-8-e1114-s001.pdf]

A

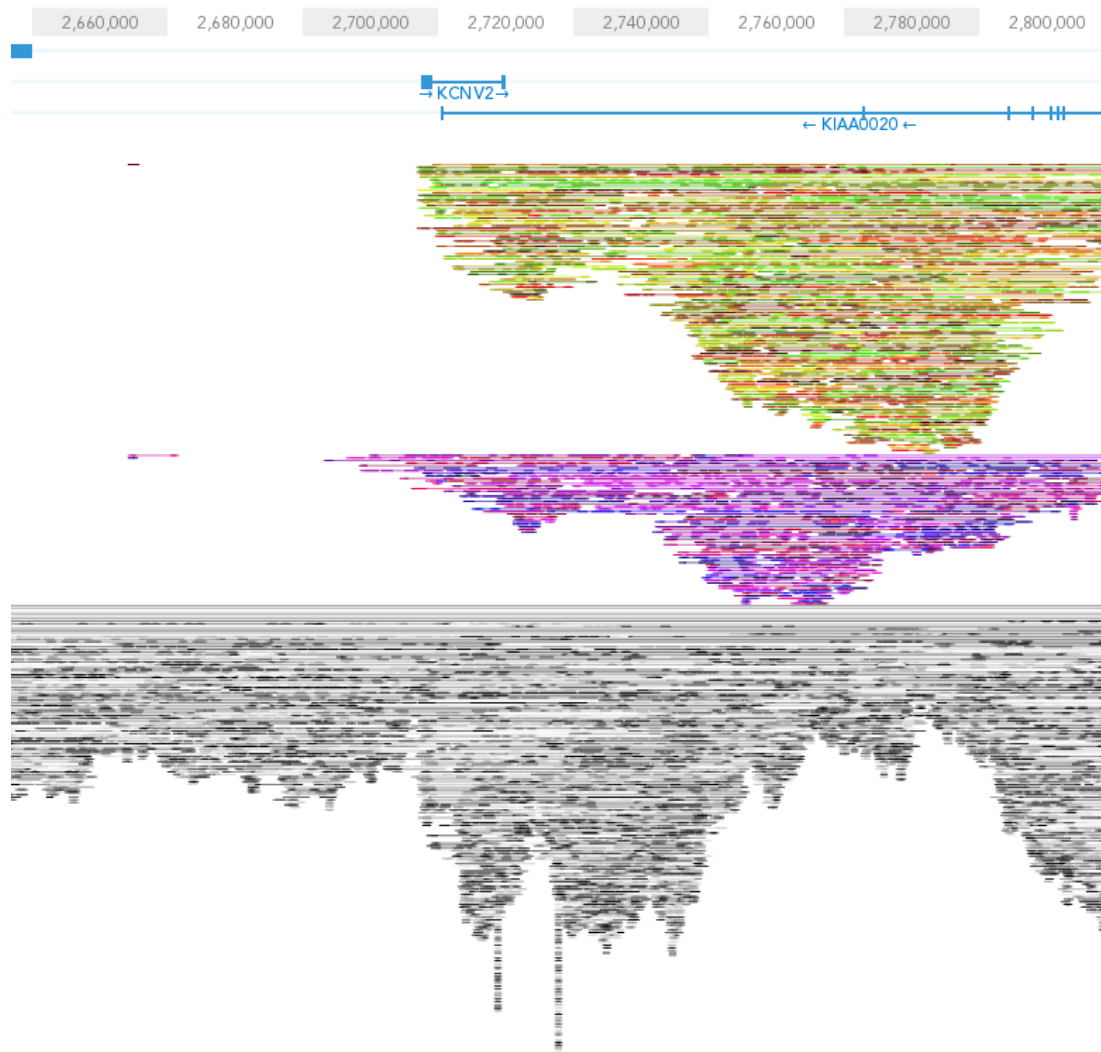

B

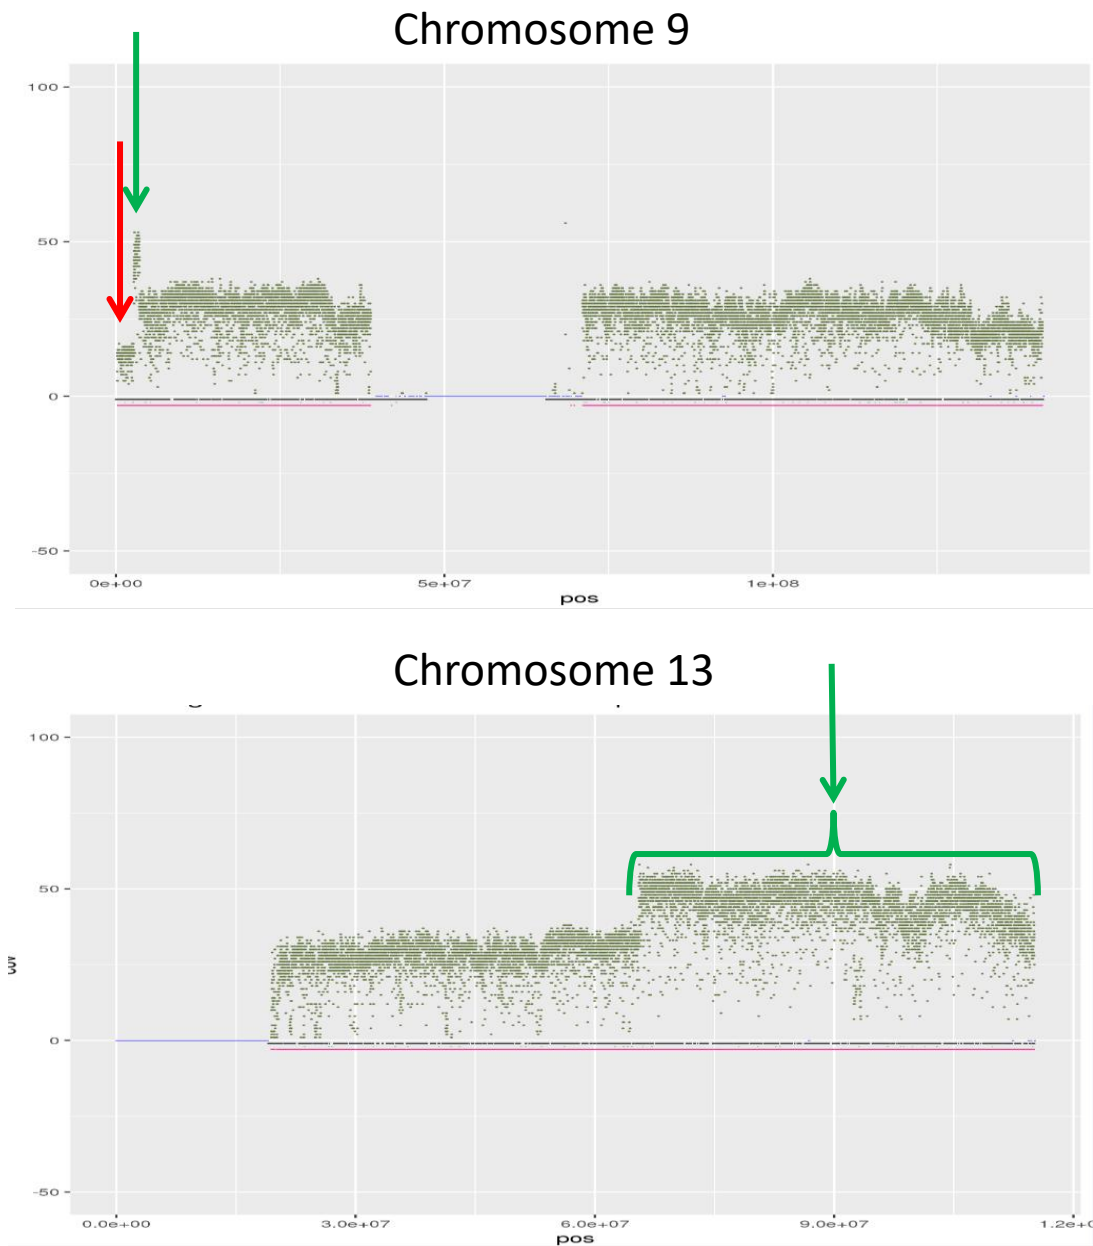

**Figure S1. Loupe visualization and depth analysis of patient 2. A.** Loupe visualization of the 9p terminal deletion (1-2,727,510) and duplication (2,725,389-3,625,909) junction region. Yellow linked-reads are associated with a haplotype and pink linked-reads are associated with the other. The grey linked-reads correspond to unphased linked-reads. **B.** The mean depths are calculated using Refscope, a CNRGH in house filtering strategy that only consider non-ambiguous read mapping. Red arrow indicates the deletion and green arrows indicate the duplications.

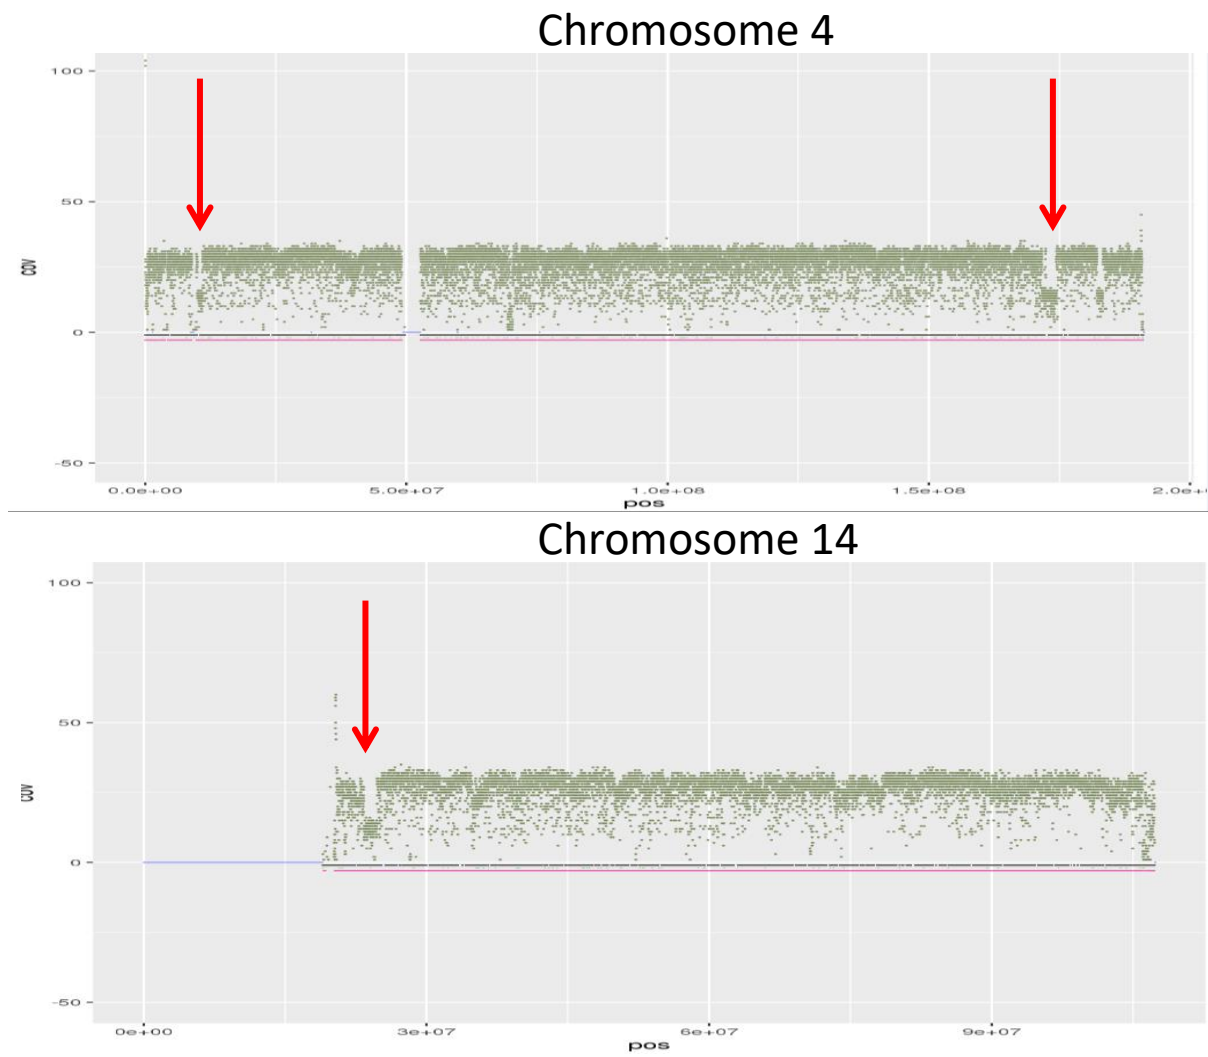

**Figure S2. Depth analysis of patient 4.** The mean depths are calculated using Refscope. Red arrows indicate the three deletions detected by array-CGH.

A.

### Chromosome X

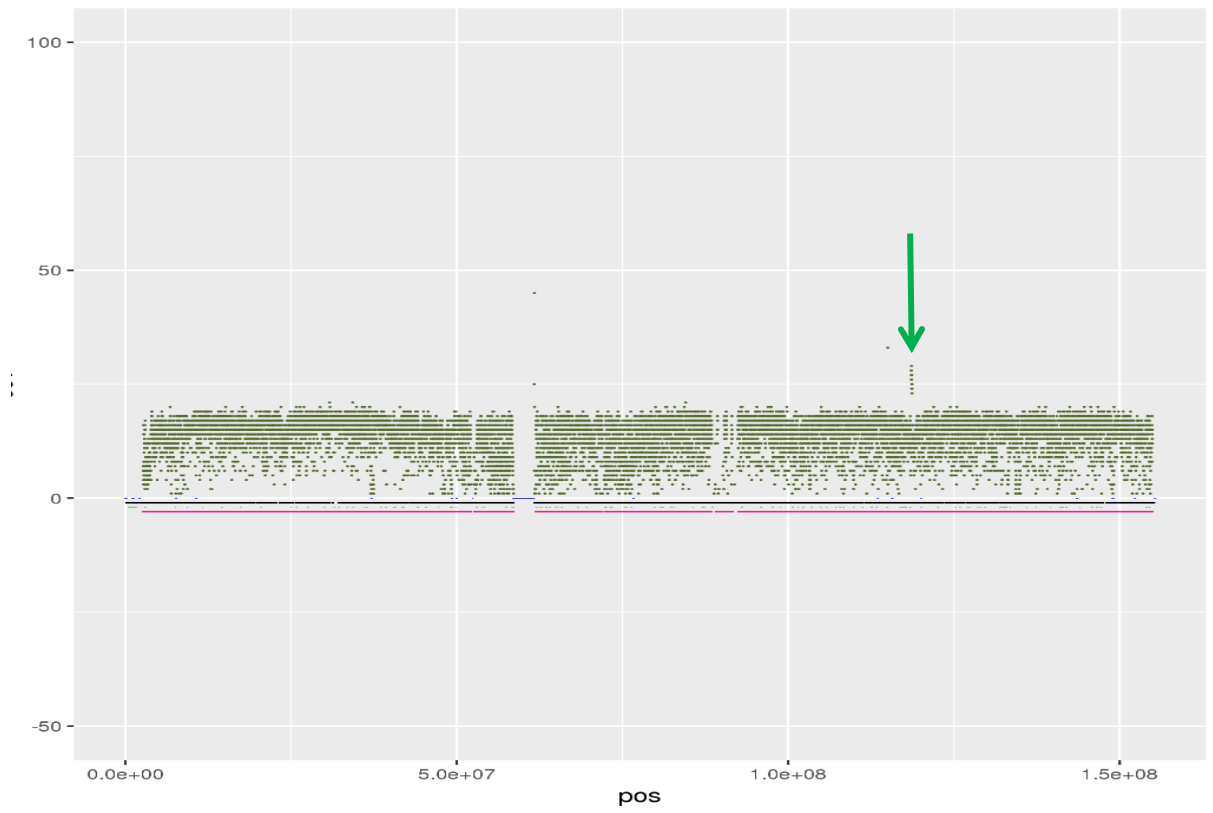

B.

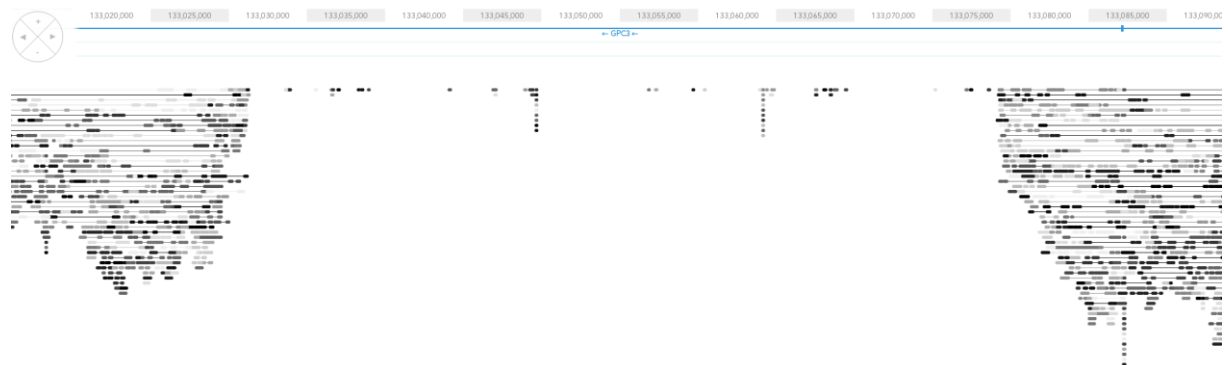

C.

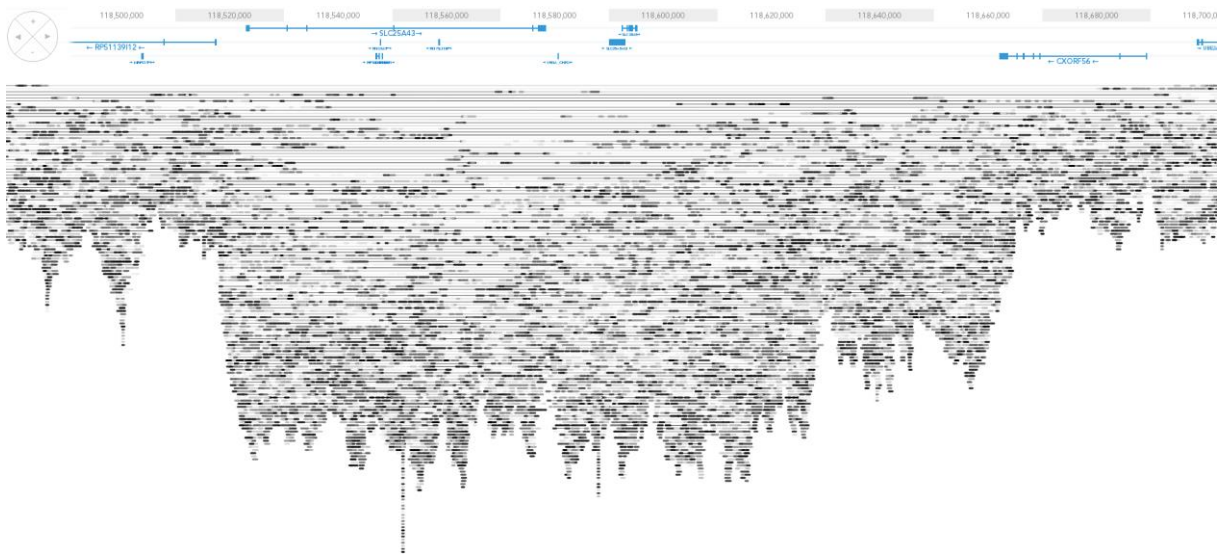

**Figure S3. Loupe visualization and depth analysis of patient 5. A.** The mean depths are calculated using Refscope. Green arrow indicates the duplication. **B and C.** Loupe visualization focused on the deletion (B) and duplication (C).

g.[chr1:pter\_7130532::chrX:49826909\_cen\_qter]

chr1(+)

TTGAAAAATGGGCGTGATACTGGTGGTCGCTGTTGTCTTCCCGCAGCGATAGAATGAGGCTCTGCAG  
TGATTTCTTTTCCTTCAAAGTCGAAAGCTCCT

der(X)

TTGAAAAATGGGCGTGATACTGGTGGTCGCTGTTGTCTTCCCGCAGCGATATTTCAGGAAACCCATCTC  
ACGTGCAGAGACACACATAGGCTCAAATAAAA

chrX (+)

GACACAGACTGGCAAGTTGGATAAAGAGTCAAGACCCATCAGTGTGCTGTATTTCAGGAAACCCATCT  
CACGTGCAGAGACACACATAGGCTCAAATAAAA

g.[chrX:pter\_49826908::chr1:7130533\_cen\_qter]

chrX (+)

CACAGACTGGCAAGTTGGATAAAGAGTCAAGACCCATCAGTGTGCTGTATTTCAGGAAACCCATCTCA  
CGTGCAGAGACACACATAGGCTCAAATAAAAAG

der(1)

CACAGACTGGCAAGTTGGATAAAGAGTCAAGACCCATCAGTGTGCTGTATAGAATGAGGCTCTGCAG  
TGATTTCTTTTCCTTCAAAGTCGAAAGCTCCT

chr1(+)

TTGAAAAATGGGCGTGATACTGGTGGTCGCTGTTGTCTTCCCGCAGCGATAGAATGAGGCTCTGCAG  
TGATTTCTTTTCCTTCAAAGTCGAAAGCTCCT

**Figure S4. Sanger sequencing of patient 7.**

**A** 1 Candidate deletions  $\geq 30\text{kb}$

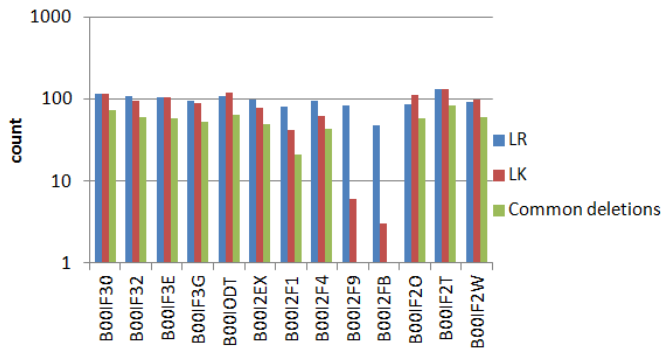

2 Robust deletions  $\geq 30\text{kb}$

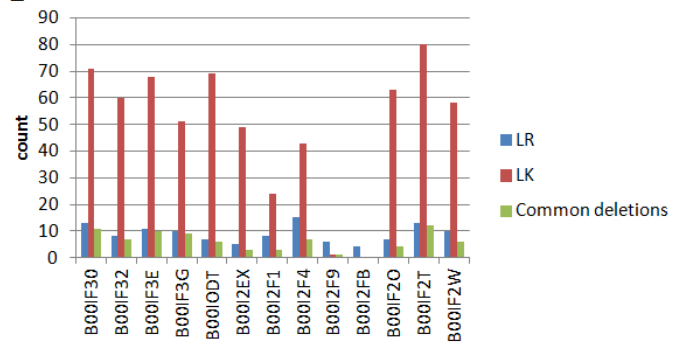

**B** 1 Candidate duplications  $\geq 30\text{kb}$

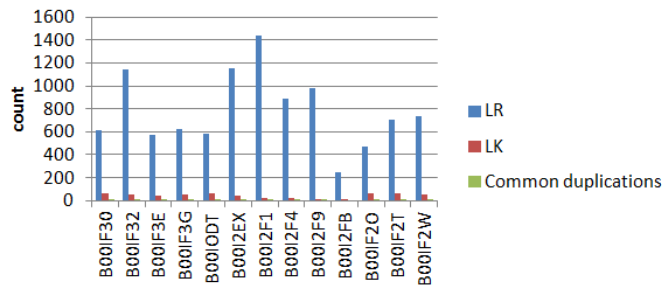

2 Robust duplications  $\geq 30\text{kb}$

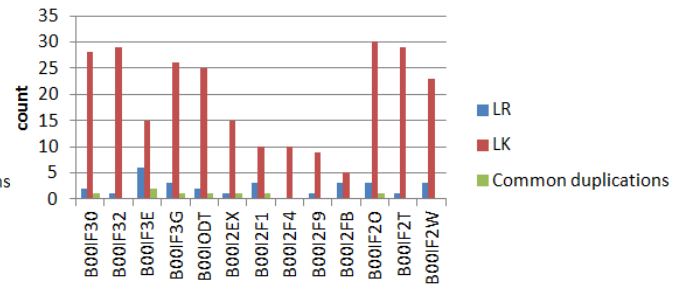

**C** 1 Candidate inversions  $\geq 30\text{kb}$

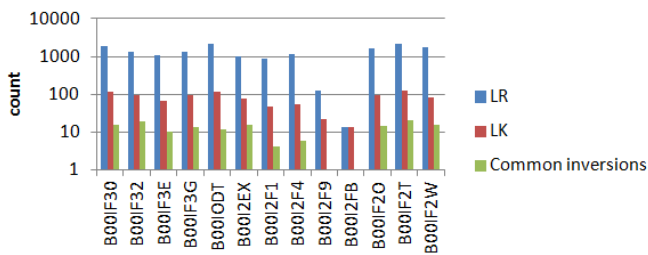

2 Robust inversions  $\geq 30\text{kb}$

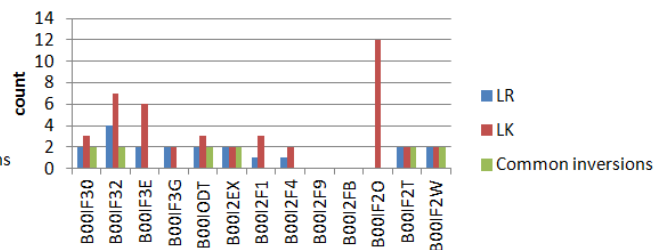

**D** 1 Candidate translocations

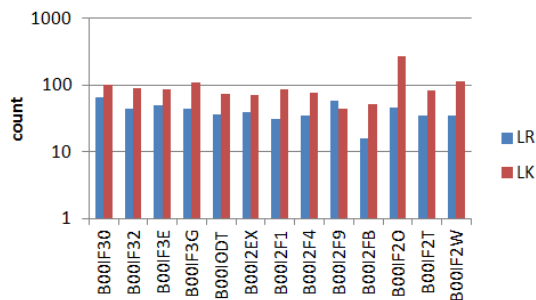

2 Robust translocations

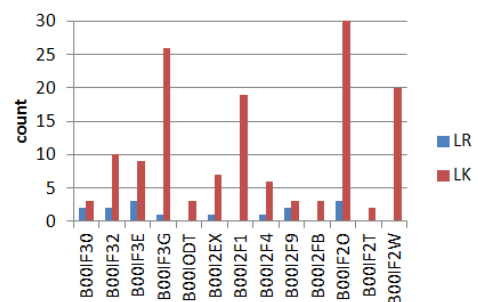

**Figure S5 LinkedSV and LongRanger SV call comparisons.** This figure represents the counts of candidate, robust and common calls of deletions (A), duplications (B) and inversions (C) identified by linkedSV (LK) and LongRanger (LR). A log-10 scale is used for candidates calls. In Fig. D-2 the y axis was cut; the count of robust translocations in B00IF2O is equal to 155.
